# Supplementary material for: Multiple Pre-Treatment miRNAs Levels in Untreated Major Depressive Disorder Patients Predict Early Response to Antidepressants and Interact with Key Pathways
Source: MDPI journal article supplement (doi:10.3390/ijms23073873), 2022-03-31
Supplement: s1 [file s1]

**Supplementary Table S1.** A total of 228 miRNAs significantly correlated with the changes in HAM-D score for SSRI at week 2 after FDR correction.

| has-miRNA    | coefficient | p-value  | Adjusted         | has-miRNA    | coefficient | p-value | Adjusted         | has-miRNA   | coefficient | p-value | Adjusted         |
|--------------|-------------|----------|------------------|--------------|-------------|---------|------------------|-------------|-------------|---------|------------------|
|              |             |          | p-value<br>(FDR) |              |             |         | p-value<br>(FDR) |             |             |         | p-value<br>(FDR) |
| miR-483-5p   | 2.495       | 7.90E-05 | 0.0436           | miR-4726-5p  | 2.923       | 0.0013  | 0.0183           | miR-4751    | 2.602       | 0.0038  | 0.0271           |
| miR-3151-5p  | 3.510       | 0.0001   | 0.0317           | miR-937-5p   | 2.666       | 0.0013  | 0.0185           | miR-6870-5p | 2.070       | 0.0038  | 0.0268           |
| miR-7109-5p  | 2.848       | 0.0001   | 0.0266           | miR-4294     | 2.097       | 0.0013  | 0.0181           | miR-6731-3p | 4.188       | 0.0038  | 0.0266           |
| miR-6807-5p  | 2.381       | 0.0002   | 0.0225           | miR-4769-3p  | 2.648       | 0.0015  | 0.0198           | miR-6880-5p | 1.967       | 0.0039  | 0.0268           |
| miR-30c-1-3p | 2.138       | 0.0003   | 0.0276           | miR-6845-5p  | 3.005       | 0.0016  | 0.0205           | miR-3135b   | 2.552       | 0.0039  | 0.0265           |
| miR-6769a-3p | 3.474       | 0.0003   | 0.0234           | miR-6127     | 2.389       | 0.0016  | 0.0201           | miR-6825-5p | 1.585       | 0.0040  | 0.0266           |
| miR-7111-3p  | 3.241       | 0.0003   | 0.0232           | miR-197-3p   | 2.742       | 0.0016  | 0.0198           | miR-4463    | 2.856       | 0.0040  | 0.0265           |
| miR-6796-3p  | 2.836       | 0.0003   | 0.0211           | miR-1281     | 2.741       | 0.0017  | 0.0198           | miR-7114-5p | 1.637       | 0.0041  | 0.0269           |
| miR-1249-5p  | 2.664       | 0.0003   | 0.0188           | miR-874-5p   | 2.214       | 0.0018  | 0.0212           | miR-6824-5p | 2.167       | 0.0042  | 0.0274           |
| miR-4534     | 2.329       | 0.0003   | 0.0170           | miR-6861-3p  | 2.541       | 0.0018  | 0.0213           | miR-4749-3p | 2.409       | 0.0043  | 0.0276           |
| miR-4646-3p  | 3.164       | 0.0003   | 0.0161           | miR-7107-5p  | 2.371       | 0.0019  | 0.0211           | miR-6779-5p | 2.519       | 0.0044  | 0.0281           |
| miR-642b-3p  | 2.659       | 0.0004   | 0.0172           | miR-6889-5p  | 2.135       | 0.0019  | 0.0212           | miR-328-5p  | 2.798       | 0.0045  | 0.0280           |
| miR-7111-5p  | 2.765       | 0.0004   | 0.0160           | miR-1229-5p  | 2.691       | 0.0020  | 0.0220           | miR-557     | 2.425       | 0.0045  | 0.0277           |
| miR-1202     | 2.514       | 0.0004   | 0.0153           | miR-6829-5p  | 2.981       | 0.0021  | 0.0225           | miR-4783-3p | 2.604       | 0.0046  | 0.0282           |
| miR-4526     | 3.096       | 0.0004   | 0.0148           | miR-6891-5p  | 2.360       | 0.0022  | 0.0230           | miR-4723-3p | 1.991       | 0.0047  | 0.0283           |
| miR-193b-3p  | 3.588       | 0.0005   | 0.0175           | miR-92a-2-5p | 1.797       | 0.0022  | 0.0230           | miR-4259    | 2.583       | 0.0048  | 0.0286           |
| miR-7112-5p  | 2.446       | 0.0006   | 0.0186           | miR-671-5p   | 1.976       | 0.0023  | 0.0230           | miR-3162-5p | 2.479       | 0.0048  | 0.0284           |
| miR-6774-5p  | 2.606       | 0.0006   | 0.0177           | miR-3679-3p  | 2.464       | 0.0023  | 0.0229           | miR-4417    | 2.533       | 0.0050  | 0.0294           |
| miR-642a-3p  | 2.116       | 0.0006   | 0.0176           | miR-5196-5p  | 2.537       | 0.0024  | 0.0233           | miR-5090    | 2.479       | 0.0051  | 0.0296           |
| miR-6510-5p  | 2.510       | 0.0007   | 0.0181           | miR-4479     | 3.048       | 0.0024  | 0.0232           | miR-4725-5p | 2.719       | 0.0053  | 0.0303           |
| miR-6891-3p  | 3.405       | 0.0007   | 0.0176           | miR-3141     | 2.109       | 0.0025  | 0.0230           | miR-6768-5p | 1.747       | 0.0053  | 0.0300           |
| miR-7150     | 2.328       | 0.0007   | 0.0181           | miR-6808-5p  | 2.117       | 0.0025  | 0.0230           | miR-8089    | 2.655       | 0.0053  | 0.0298           |
| miR-3614-5p  | 2.691       | 0.0007   | 0.0176           | miR-2861     | 4.272       | 0.0025  | 0.0229           | miR-3154    | 1.659       | 0.0053  | 0.0295           |
| miR-4758-3p  | 2.784       | 0.0008   | 0.0174           | miR-4687-5p  | 2.572       | 0.0025  | 0.0227           | miR-6786-5p | 4.067       | 0.0055  | 0.0305           |
| miR-7155-5p  | 2.668       | 0.0008   | 0.0170           | miR-6085     | 2.660       | 0.0026  | 0.0229           | miR-658     | 1.832       | 0.0057  | 0.0312           |

|                     |       |        |        |                     |       |        |        |                     |       |        |        |
|---------------------|-------|--------|--------|---------------------|-------|--------|--------|---------------------|-------|--------|--------|
| <b>miR-6124</b>     | 2.337 | 0.0008 | 0.0168 | <b>miR-1275</b>     | 2.472 | 0.0027 | 0.0233 | <b>miR-1233-5p</b>  | 2.322 | 0.0058 | 0.0316 |
| <b>miR-6769b-5p</b> | 2.714 | 0.0008 | 0.0171 | <b>miR-675-5p</b>   | 2.019 | 0.0028 | 0.0237 | <b>miR-6782-5p</b>  | 2.515 | 0.0059 | 0.0317 |
| <b>miR-1273g-3p</b> | 1.903 | 0.0009 | 0.0178 | <b>miR-4687-3p</b>  | 2.589 | 0.0029 | 0.0239 | <b>miR-3187-3p</b>  | 1.492 | 0.0060 | 0.0319 |
| <b>miR-3158-5p</b>  | 2.231 | 0.0010 | 0.0182 | <b>miR-6781-5p</b>  | 2.994 | 0.0029 | 0.0243 | <b>miR-4689</b>     | 2.360 | 0.0064 | 0.0334 |
| <b>miR-6738-5p</b>  | 3.034 | 0.0010 | 0.0181 | <b>miR-1913</b>     | 2.632 | 0.0029 | 0.0239 | <b>miR-6775-5p</b>  | 2.339 | 0.0067 | 0.0349 |
| <b>miR-4723-5p</b>  | 1.987 | 0.0010 | 0.0184 | <b>miR-6727-3p</b>  | 2.472 | 0.0030 | 0.0242 | <b>miR-3197</b>     | 2.672 | 0.0069 | 0.0357 |
| <b>miR-652-5p</b>   | 2.087 | 0.0010 | 0.0179 | <b>miR-6797-3p</b>  | 2.389 | 0.0031 | 0.0247 | <b>miR-3196</b>     | 4.162 | 0.0070 | 0.0358 |
| <b>miR-6785-3p</b>  | 4.040 | 0.0011 | 0.0192 | <b>miR-296-5p</b>   | 2.814 | 0.0031 | 0.0243 | <b>miR-4728-3p</b>  | 2.185 | 0.0070 | 0.0355 |
| <b>miR-6515-3p</b>  | 2.940 | 0.0012 | 0.0188 | <b>miR-6845-3p</b>  | 2.814 | 0.0033 | 0.0255 | <b>miR-6716-5p</b>  | 2.347 | 0.0071 | 0.0359 |
| <b>miR-625-3p</b>   | 4.040 | 0.0012 | 0.0184 | <b>miR-1343-5p</b>  | 2.584 | 0.0034 | 0.0255 | <b>miR-532-3p</b>   | 2.731 | 0.0072 | 0.0359 |
| <b>miR-6766-3p</b>  | 2.602 | 0.0012 | 0.0185 | <b>miR-6894-3p</b>  | 2.026 | 0.0034 | 0.0253 | <b>miR-6762-5p</b>  | 2.696 | 0.0072 | 0.0356 |
| <b>miR-4739</b>     | 3.057 | 0.0012 | 0.0180 | <b>miR-371a-5p</b>  | 2.635 | 0.0035 | 0.0257 | <b>miR-4656</b>     | 2.146 | 0.0074 | 0.0361 |
| <b>miR-4731-5p</b>  | 3.231 | 0.0013 | 0.0183 | <b>miR-6799-5p</b>  | 2.109 | 0.0037 | 0.0268 | <b>miR-6830-5p</b>  | 3.314 | 0.0076 | 0.0368 |
| <b>miR-6816-5p</b>  | 3.085 | 0.0079 | 0.0379 | <b>miR-6087</b>     | 3.338 | 0.0116 | 0.0418 | <b>miR-6865-3p</b>  | 2.053 | 0.0159 | 0.0459 |
| <b>miR-6749-5p</b>  | 2.485 | 0.0079 | 0.0377 | <b>miR-6819-5p</b>  | 2.584 | 0.0117 | 0.0418 | <b>miR-6885-3p</b>  | 2.078 | 0.0159 | 0.0457 |
| <b>miR-7845-5p</b>  | 2.275 | 0.0081 | 0.0381 | <b>miR-4530</b>     | 1.736 | 0.0117 | 0.0417 | <b>miR-4749-5p</b>  | 2.063 | 0.0161 | 0.0460 |
| <b>miR-6757-5p</b>  | 2.081 | 0.0081 | 0.0380 | <b>miR-4433b-3p</b> | 2.343 | 0.0120 | 0.0423 | <b>miR-4327</b>     | 1.907 | 0.0161 | 0.0459 |
| <b>miR-6797-5p</b>  | 2.479 | 0.0081 | 0.0377 | <b>miR-6846-5p</b>  | 1.975 | 0.0120 | 0.0422 | <b>miR-8071</b>     | 1.559 | 0.0163 | 0.0463 |
| <b>miR-6879-5p</b>  | 2.274 | 0.0081 | 0.0374 | <b>miR-6877-5p</b>  | 2.464 | 0.0121 | 0.0424 | <b>miR-4701-5p</b>  | 2.787 | 0.0165 | 0.0465 |
| <b>miR-6859-3p</b>  | 2.566 | 0.0081 | 0.0371 | <b>miR-135a-3p</b>  | 2.071 | 0.0123 | 0.0427 | <b>miR-4673</b>     | 2.080 | 0.0166 | 0.0466 |
| <b>miR-6752-5p</b>  | 2.841 | 0.0082 | 0.0373 | <b>miR-4507</b>     | 1.868 | 0.0124 | 0.0427 | <b>miR-4763-5p</b>  | 1.812 | 0.0167 | 0.0466 |
| <b>miR-6858-3p</b>  | 2.417 | 0.0084 | 0.0378 | <b>miR-3180</b>     | 2.322 | 0.0124 | 0.0424 | <b>miR-6813-3p</b>  | 2.279 | 0.0173 | 0.0479 |
| <b>miR-4485-5p</b>  | 1.345 | 0.0085 | 0.0381 | <b>miR-874-3p</b>   | 2.049 | 0.0125 | 0.0427 | <b>miR-6769a-5p</b> | 1.973 | 0.0176 | 0.0485 |
| <b>miR-1249-3p</b>  | 2.795 | 0.0086 | 0.0379 | <b>miR-3131</b>     | 2.007 | 0.0127 | 0.0432 | <b>miR-548q</b>     | 1.668 | 0.0176 | 0.0483 |
| <b>miR-760</b>      | 2.132 | 0.0087 | 0.0379 | <b>miR-3195</b>     | 2.195 | 0.0128 | 0.0429 | <b>miR-4685-5p</b>  | 2.596 | 0.0176 | 0.0481 |
| <b>miR-6792-5p</b>  | 2.524 | 0.0087 | 0.0379 | <b>miR-6805-5p</b>  | 2.802 | 0.0129 | 0.0430 | <b>miR-3652</b>     | 1.721 | 0.0176 | 0.0479 |
| <b>miR-6842-5p</b>  | 1.600 | 0.0087 | 0.0376 | <b>miR-6860</b>     | 1.931 | 0.0130 | 0.0433 | <b>miR-4443</b>     | 1.424 | 0.0178 | 0.0481 |
| <b>miR-1228-5p</b>  | 3.208 | 0.0088 | 0.0376 | <b>miR-6724-5p</b>  | 2.303 | 0.0132 | 0.0435 | <b>miR-4758-5p</b>  | 2.379 | 0.0178 | 0.0479 |
| <b>miR-3147</b>     | 2.260 | 0.0092 | 0.0390 | <b>miR-6875-5p</b>  | 2.314 | 0.0132 | 0.0433 | <b>miR-3122</b>     | 2.066 | 0.0178 | 0.0477 |

|                    |       |        |        |                     |       |        |        |                    |       |        |        |
|--------------------|-------|--------|--------|---------------------|-------|--------|--------|--------------------|-------|--------|--------|
| <b>miR-5572</b>    | 2.286 | 0.0093 | 0.0390 | <b>miR-5698</b>     | 1.852 | 0.0132 | 0.0431 | <b>miR-6812-5p</b> | 2.044 | 0.0183 | 0.0487 |
| <b>miR-6880-3p</b> | 2.196 | 0.0093 | 0.0390 | <b>miR-6810-3p</b>  | 2.124 | 0.0134 | 0.0435 | <b>miR-3648</b>    | 2.965 | 0.0184 | 0.0489 |
| <b>miR-6786-3p</b> | 2.188 | 0.0094 | 0.0389 | <b>miR-6813-5p</b>  | 2.228 | 0.0135 | 0.0435 | <b>miR-4731-3p</b> | 2.051 | 0.0186 | 0.0491 |
| <b>miR-4750-5p</b> | 1.518 | 0.0097 | 0.0398 | <b>miR-6821-5p</b>  | 2.054 | 0.0135 | 0.0434 | <b>miR-2116-3p</b> | 2.121 | 0.0186 | 0.0489 |
| <b>miR-4271</b>    | 1.940 | 0.0098 | 0.0401 | <b>miR-1237-5p</b>  | 3.476 | 0.0135 | 0.0432 | <b>miR-92b-5p</b>  | 1.972 | 0.0188 | 0.0493 |
| <b>miR-575</b>     | 1.422 | 0.0098 | 0.0400 | <b>miR-4433a-5p</b> | 2.190 | 0.0138 | 0.0438 | <b>miR-1237-3p</b> | 1.640 | 0.0189 | 0.0491 |
| <b>miR-4462</b>    | 2.103 | 0.0099 | 0.0397 | <b>miR-665</b>      | 1.839 | 0.0139 | 0.0440 | <b>miR-4707-5p</b> | 1.927 | 0.0191 | 0.0494 |
| <b>miR-187-5p</b>  | 1.553 | 0.0099 | 0.0397 | <b>miR-6893-3p</b>  | 1.625 | 0.0140 | 0.0439 | <b>miR-4632-5p</b> | 1.715 | 0.0191 | 0.0493 |
| <b>miR-6877-3p</b> | 2.019 | 0.0100 | 0.0398 | <b>miR-6076</b>     | 1.590 | 0.0140 | 0.0438 | <b>miR-7847-3p</b> | 2.132 | 0.0191 | 0.0491 |
| <b>miR-4728-5p</b> | 2.579 | 0.0100 | 0.0395 | <b>miR-6765-3p</b>  | 1.376 | 0.0141 | 0.0437 | <b>miR-6840-3p</b> | 2.235 | 0.0193 | 0.0493 |
| <b>miR-1228-3p</b> | 2.624 | 0.0100 | 0.0393 | <b>miR-4484</b>     | 1.768 | 0.0142 | 0.0439 | <b>miR-3928-3p</b> | 1.947 | 0.0194 | 0.0494 |
| <b>miR-6875-3p</b> | 2.599 | 0.0103 | 0.0401 | <b>miR-550a-5p</b>  | 1.921 | 0.0143 | 0.0438 | <b>miR-1914-3p</b> | 2.302 | 0.0195 | 0.0494 |
| <b>miR-1224-3p</b> | 2.154 | 0.0104 | 0.0402 | <b>miR-6800-3p</b>  | 2.350 | 0.0144 | 0.0438 | <b>miR-197-5p</b>  | 2.050 | 0.0196 | 0.0494 |
| <b>miR-4279</b>    | 2.022 | 0.0109 | 0.0416 | <b>miR-718</b>      | 2.307 | 0.0145 | 0.0441 | <b>miR-6801-3p</b> | 2.218 | 0.0197 | 0.0494 |
| <b>miR-6729-3p</b> | 2.113 | 0.0109 | 0.0417 | <b>miR-6862-3p</b>  | 1.666 | 0.0148 | 0.0448 | <b>miR-3180-3p</b> | 2.286 | 0.0197 | 0.0492 |
| <b>miR-4763-3p</b> | 1.893 | 0.0110 | 0.0414 | <b>miR-6827-5p</b>  | 2.062 | 0.0152 | 0.0455 | <b>miR-6858-5p</b> | 2.107 | 0.0197 | 0.0490 |
| <b>miR-7113-3p</b> | 2.019 | 0.0110 | 0.0413 | <b>miR-1225-5p</b>  | 1.959 | 0.0152 | 0.0454 | <b>miR-1236-3p</b> | 2.211 | 0.0198 | 0.0491 |
| <b>miR-1227-5p</b> | 2.268 | 0.0110 | 0.0410 | <b>miR-2110</b>     | 2.289 | 0.0152 | 0.0451 | <b>miR-7108-5p</b> | 2.042 | 0.0202 | 0.0498 |
| <b>miR-4459</b>    | 1.632 | 0.0111 | 0.0410 | <b>miR-4695-3p</b>  | 1.605 | 0.0155 | 0.0458 | <b>miR-4800-5p</b> | 1.700 | 0.0204 | 0.0500 |
| <b>miR-4449</b>    | 2.224 | 0.0114 | 0.0418 | <b>miR-6787-5p</b>  | 2.243 | 0.0155 | 0.0456 | <b>miR-6851-5p</b> | 1.997 | 0.0204 | 0.0498 |
| <b>miR-6803-5p</b> | 2.620 | 0.0114 | 0.0418 | <b>miR-371b-5p</b>  | 1.913 | 0.0156 | 0.0455 | <b>miR-3185</b>    | 1.688 | 0.0205 | 0.0498 |
| <b>miR-4651</b>    | 2.496 | 0.0115 | 0.0418 | <b>miR-6867-3p</b>  | 2.123 | 0.0156 | 0.0454 | <b>miR-4741</b>    | 1.701 | 0.0206 | 0.0499 |
